# Supplementary material for: Amoeboid cells undergo durotaxis with soft end polarized NMIIA
Source: eLife journal article supplement (doi:10.7554/elife.96821), 2024-05-24

Figure 3-source data 2\_western blot with labelled bands

NMIIA bands

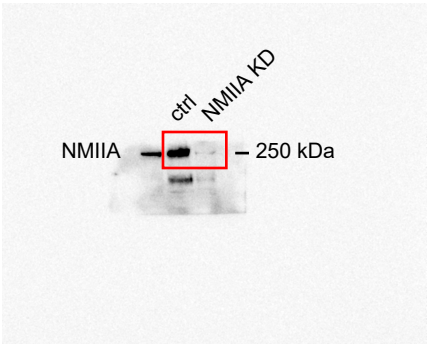

NMIIB bands

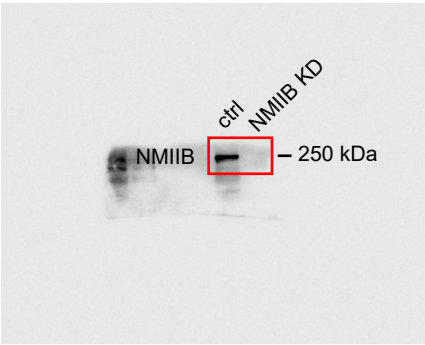

$\alpha$ -tubulin bands

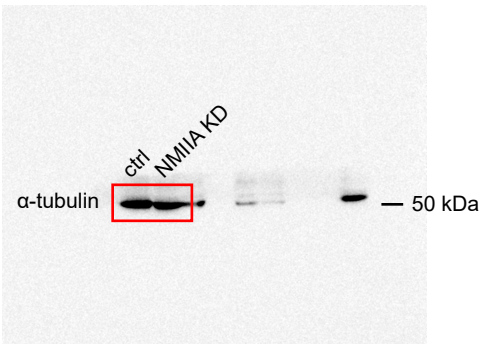

$\alpha$ -tubulin bands

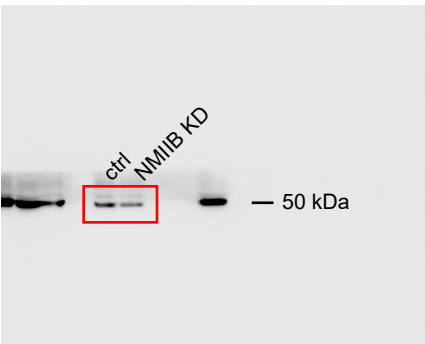

Supplement: fig3-data2 [file Figure 3-source data 2_western blot with labelled bands.pdf › Figure 3-source data 2/Figure 3-source data 2_western blot with labelled bands.pdf]
