# Supplementary material for: Amoeboid cells undergo durotaxis with soft end polarized NMIIA
Source: eLife journal article supplement (doi:10.7554/elife.96821), 2024-05-24

Figure 3-figure supplement 1-source data 2\_western blot with labelled bands

NMIIA bands

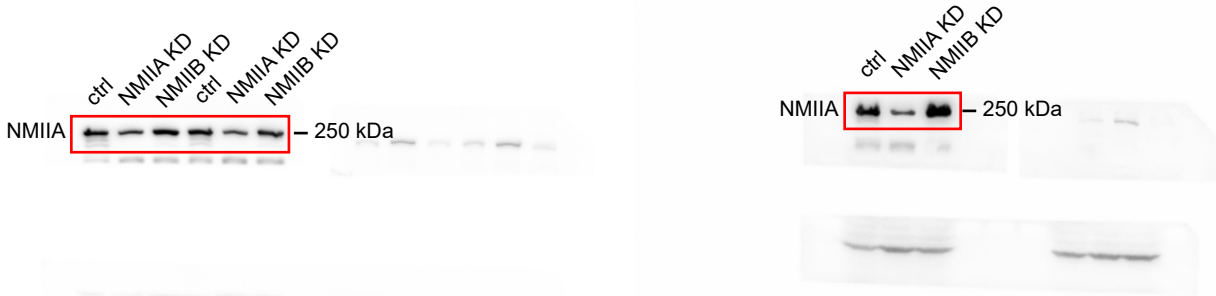

NMIIB bands

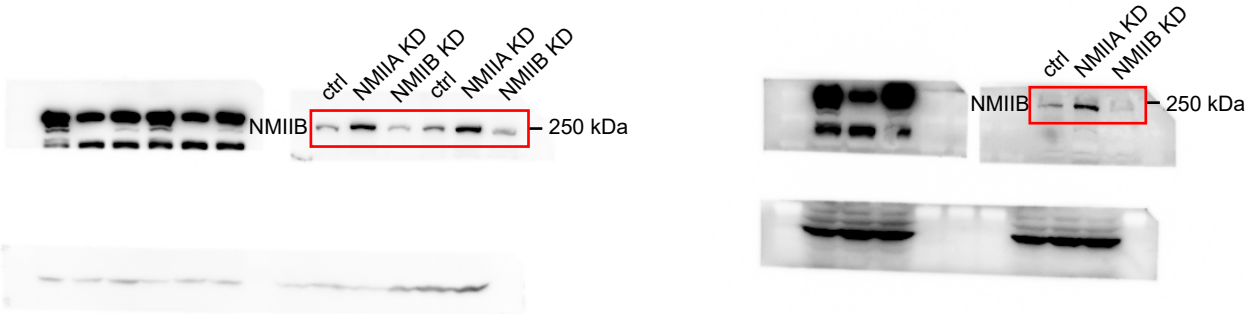

$\alpha$ -tubulin bands

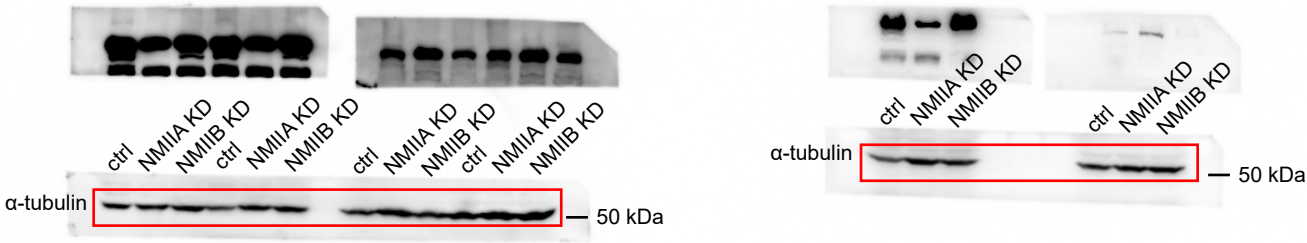

bands with markers

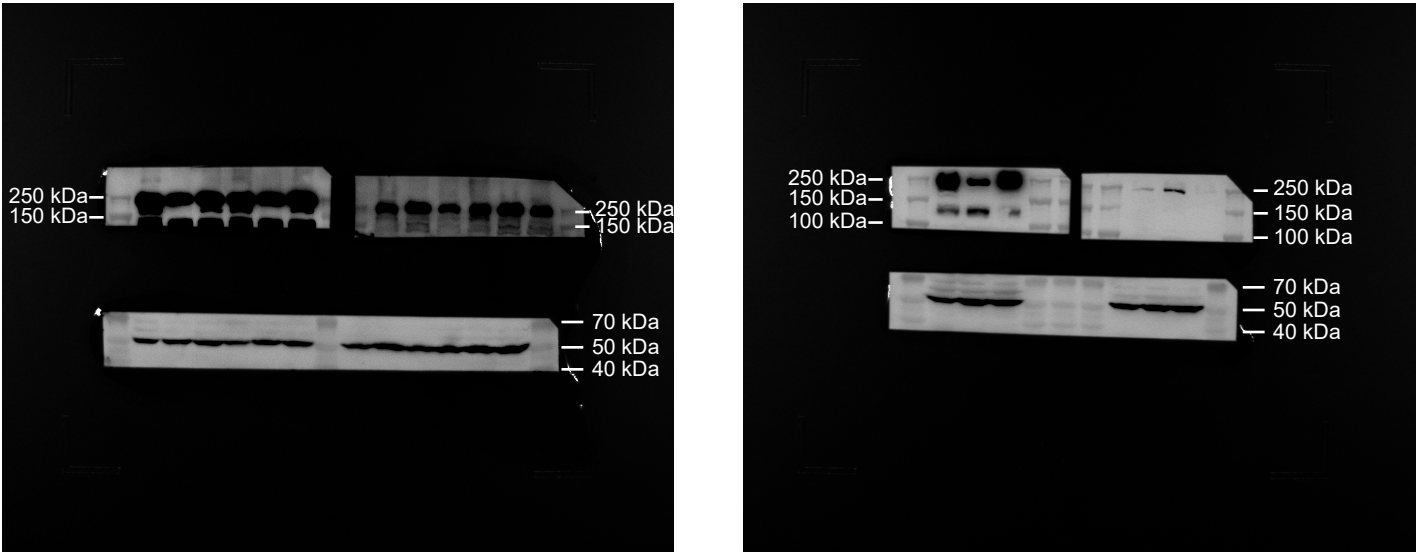

Supplement: fig3-figsupp1-data2 [file elife-96821-fig3-figsupp1-data2-v1.zip]
